1 **Interspecies Chimeric Conditions Affect the Developmental Rate of**  
2 **Human Pluripotent Stem Cells**

3

4 Jared Brown<sup>1\*</sup>, Christopher Barry<sup>2\*†</sup>, Matthew T. Schmitz<sup>2</sup>, Cara Argus<sup>2</sup>, Jennifer M.  
5 Bolin<sup>2</sup>, Michael P. Schwartz<sup>3</sup>, Amy Van Aartsen<sup>2</sup>, John Steill<sup>2</sup>, Scott Swanson<sup>2</sup>, Ron  
6 Stewart<sup>2</sup>, James A. Thomson<sup>2,4,5#</sup>, and Christina Kendziorski<sup>6#†</sup>

7

8 <sup>1</sup>Department of Statistics, University of Wisconsin-Madison, WI, USA; <sup>2</sup>Morgridge Institute for Research,  
9 Madison, WI 53715, USA; <sup>3</sup>Sustainable Nanotechnology Center, University of Wisconsin-Madison, WI,  
10 USA; <sup>4</sup>Department of Cell and Regenerative Biology, University of Wisconsin School of Medicine and  
11 Public Health, Madison, WI 53706, USA; <sup>5</sup>Department of Molecular, Cellular, and Developmental Biology,  
12 University of California, Santa Barbara, CA 93106 USA; <sup>6</sup>Department of Biostatistics and Medical  
13 Informatics, University of Wisconsin-Madison, WI, USA.

14

15 \*These authors contributed equally to this work

16 #These authors supervised this work equally

17 †Corresponding Authors: Christina Kendziorski, Department of Biostatistics and Medical Informatics,

18

University of Wisconsin-Madison, WI, USA

19

[kenzior@biostat.wisc.edu](mailto:kenzior@biostat.wisc.edu)

20

Christopher Barry, Morgridge Institute for Research, Madison, WI, USA

21

[chrisbarry1@hotmail.com](mailto:chrisbarry1@hotmail.com)

22

23

24

25

26 **ABSTRACT**

27 **Human pluripotent stem cells hold significant promise for regenerative medicine.**  
28 **However, long differentiation protocols and immature characteristics of stem cell-**  
29 **derived cell types remain challenges to the development of many therapeutic**  
30 **applications. In contrast to the slow differentiation of human stem cells *in vitro* that**  
31 **mirrors a nine-month gestation period, mouse stem cells develop according to a much**  
32 **faster three-week gestation timeline. Here, we tested if co-differentiation with mouse**  
33 **pluripotent stem cells could accelerate the differentiation speed of human embryonic**  
34 **stem cells. Following a six-week RNA-sequencing time course of neural differentiation,**  
35 **we identified 929 human genes that were upregulated earlier and 535 genes that**  
36 **exhibited earlier peaked expression profiles in chimeric cell cultures than in human**  
37 **cell cultures alone. Genes with accelerated upregulation were significantly enriched in**  
38 **Gene Ontology terms associated with neurogenesis, neuron differentiation and**  
39 **maturation, and synapse signaling. Moreover, chimeric mixed samples correlated with**  
40 ***in utero* human embryonic samples earlier than human cells alone, and acceleration**  
41 **was dose-dependent on human-mouse co-culture ratios. Differences in the timing and**  
42 **expression levels of genes corresponding to neuron cell types and brain region identity**  
43 **under chimeric conditions were also observed. The altered developmental rates and**  
44 **lineage outcomes described in this report have implications for accelerating human**  
45 **stem cell differentiation and the use of interspecies chimeric embryos in developing**  
46 **human organs for transplantation.**

47

## 48 **Author Summary**

49 Human pluripotent stem cells often require long *in vitro* protocols to form mature cell  
50 types of clinical relevance for potential regenerative therapies, a ramification of a nine-  
51 month developmental clock *in utero* that also runs *ex utero*. What controls species-  
52 specific developmental time and whether the timer is amenable to acceleration is  
53 unknown. Further, interspecies chimeric embryos are increasingly being created to  
54 study early human development or explore the potential growth of human organs for  
55 transplantation. How the conflicting developmental speeds of cells from different  
56 species co-differentiating together affect each other is not understood. Here, using  
57 genome-wide transcriptional analysis of RNA-sequencing time courses, we show that 1)  
58 co-differentiating human embryonic stem cells intermixed with mouse stem cells  
59 accelerated elements of human developmental programs, 2) the acceleration was dose-  
60 dependent on the proportion of mouse cells, and 3) human cells in chimeric samples  
61 correlated to *in utero* samples earlier than human only samples. Our results provide  
62 evidence that some components of species-specific developmental clocks may be  
63 susceptible to acceleration.

64

## 65 **Introduction**

66 Mammals develop to tremendously different sizes at vastly different rates in the  
67 embryo. Little is known about the mechanisms regulating embryonic developmental  
68 rates, but they are not uniformly tied to animal size. For example, the smallest mammal,  
69 the Etruscan shrew, is approximately one eighth the birthweight of the mouse yet

70 requires 27 rather than 20 days of gestation. The hippopotamus is born a full month  
71 before a human infant yet is over ten times heavier, and the largest mammal, the blue  
72 whale, has a mass 27 times greater than that of the African elephant at birth despite  
73 requiring half the gestational time <sup>1-3</sup>.

74

75 Curiously, when pluripotent stem cells are cultured *in vitro*, they retain the  
76 developmental timing of their species of origin despite the lack of maternal factors,  
77 suggesting the existence of an intrinsic developmental clock <sup>4-10</sup>. Currently, the nature  
78 of the species-specific developmental clock, including the extent to which it can be  
79 warped, is unknown <sup>11</sup>. The retention of a slow differentiation rate that reflects a nine-  
80 month human gestation timeline often results in long differentiation protocols and  
81 immature cell characteristics that impede many potential clinical applications of human  
82 pluripotent stem cells <sup>12,13</sup>.

83

84 In contrast to the slow differentiation of human stem cells, mouse stem cells  
85 differentiate substantially more quickly, reflecting a 20-day rather than a nine-month  
86 gestation timeline <sup>8,14,15</sup>. For example, mature neurons are produced in only 5-14 days  
87 from mouse ES cells, while the same cell types can take several months to generate  
88 from human embryonic stem (hES) cells <sup>10,16-18</sup>. Previously, we found that hES cell  
89 differentiation was not accelerated in teratomas developed in a mouse despite being  
90 exposed to murine host factors <sup>4</sup>. However, we did not test whether factors active

91 during murine embryonic development could be sufficient to accelerate hES cell  
92 differentiation.  
93  
94 Here, we investigated whether hES cells co-differentiated among mouse pluripotent  
95 stem cells could accelerate their developmental rate. Under neural differentiation of  
96 chimeric co-cultures, we found earlier upregulation and peak expression of hundreds of  
97 genes involved in neurogenesis, neuron maturation, and synapse signaling compared to  
98 hES cells alone. The accelerated effects were dose-dependent on the starting ratios of  
99 human-mouse cells in co-cultures, and chimeric cultures correlated to *in utero* human  
100 embryonic samples earlier than human cells alone. We also describe temporal  
101 differences in gene expression levels corresponding to brain region identity, suggesting  
102 there may be some lineage outcome effects from chimeric co-culture conditions.  
103 Overall, we demonstrate that chimeric human-mouse culture conditions are sufficient  
104 to accelerate some elements of human stem cell differentiation.

105

## 106 **RESULTS**

### 107 **Comprehensive RNA-sequencing time course of neural differentiation in chimeric** 108 **human-mouse co-cultures.**

109 We previously described a detailed RNA-sequencing (RNA-seq) time course of mouse  
110 and human pluripotent stem cells over three- or six-weeks of neural differentiation,  
111 respectively, to characterize the drastically different species-specific rates of  
112 development *in vitro*<sup>4</sup>. Here, we set out to determine if co-differentiating human cells

113 with mouse cells together could induce the human cells to differentiation at a quickened  
114 pace. Since hES cells are thought to more closely represent a post-implantation  
115 pluripotent stage, we used the similarly-staged mouse Epiblast stem (mEpiS) cells to  
116 compare with H9 hES cells <sup>19–21</sup>. To identify cells from each species, we used mEpiS cells  
117 constitutively expressing cytoplasmic efficient green fluorescent protein (EGFP) and H9  
118 cells expressing nuclear-localized H2B-mCherry (Fig. 1).

119

120 To maximize any potential mouse-induced effects on human differentiation rate, we  
121 began by outnumbering human cells with the more quickly differentiating mouse cells in  
122 a ten-to-one ratio. 10% human co-cultured cells (H10), along with 100% mouse (M100)  
123 or 100% human (H100) control samples, were cultured under identical neural  
124 differentiation culture conditions (see Materials and Methods) and samples in triplicate  
125 were collected for RNA-seq every 24 or 48 hours for six weeks (Fig. 1). After aligning  
126 transcripts to a combined human-mouse transcriptome to derive species-specific  
127 expression from the chimeric samples, samples passing quality control parameters (S1  
128 Fig., see Materials and Methods) were processed for correlation analysis, fitted with  
129 gene expression patterns using the segmentation regression analysis R-package Trendy  
130 <sup>22</sup>, and the timing of expression pattern changes were compared across samples (Fig. 1).

131

132 Although mouse and human cells were singularized before seeding, time lapse  
133 microscopy revealed that cells preferentially associated with cells of their own species  
134 (Fig. 2, Movie S1). Flow cytometry analysis revealed that although the intended starting

135 cell ratios were seeded, as mouse cells differentiated quickly to become post-mitotic  
136 neurons, the still-proliferating human progenitor cells eventually overtook the culture.  
137 By day 12 of differentiation ~50% of H10 samples were of human composition, and by  
138 day 16 over 75% of samples were human cells (S2 Fig.). Although cells tended to  
139 associate and proliferate in species-specific clusters, cells from each species did grow  
140 alongside each other and interact (Fig. 2, Movie S1).

141

142 **Human neurogenic and synaptic genes were upregulated earlier in human-mouse**  
143 **chimeric co-cultures.**

144 To determine if gene expression patterns were accelerated in chimeric co-cultures,  
145 genes with fitted expression trends were compared between neural differentiation of  
146 human cells alone (H100) versus those mixed 1:10 with mouse cells (H10). We first  
147 asked if upregulated genes (genes trending up immediately or genes showing no change  
148 and then trending up) were upregulated earlier in mixed compared to control samples.  
149 Our bioinformatic analysis revealed that 929 genes were upregulated significantly  
150 earlier (S1 File) (begin up trending at least 2 days earlier) in H10 versus H100 samples,  
151 representing over 41% of all genes that begin as unchanged followed by upregulation  
152 (Fig. 3A). We recognized several well-described neurogenic genes identified as  
153 accelerated in this early-upregulated category (S3A Fig.), including genes involved in  
154 neural differentiation and migration (e.g. STMN2, DCX, NEFL, NEUROG2, MYT1, MAPT),  
155 forebrain development (e.g. FEZ1 and EFNB3), neuronal signaling and synapse  
156 transmission (e.g. SNAP25, SYT3, SYT4, SYN1), neural stem cell identity (e.g. FABP7,

157 FGF10), and glutamatergic and GABAergic neurons (e.g. SLC1A3, GRIN2D, GABRA1; Fig.  
158 3B). Therefore, genes from a seemingly wide range of neurodevelopmental functions  
159 were upregulated earlier under chimeric differentiation conditions.

160

161 Given that several recognizable neurogenic genes were among those identified as  
162 upregulated earlier in H10 compared to H100 samples (Fig. 3B), we set out to  
163 statistically test if early upregulated genes were specific to neural differentiation or  
164 biasedly identified from a collection of genes within a random assortment of cellular  
165 processes. Upon analyzing early-upregulated genes for functional enrichment of GO-  
166 terms, we discovered that all of the ten most statistically significantly-enriched terms  
167 were associated with neuron and synaptic signaling (Fig. 3C), confirming that neural  
168 genes were indeed specifically upregulated earlier in human cells co-differentiated with  
169 mouse cells. The beginning of upregulation was not only earlier in these GO-term-  
170 associated genes (Fig. 3D), but the duration of up-regulation was also significantly  
171 longer, often still trending upwards at the end point of the 6-week time course (Fig. 3E).  
172 However, although the up-trend started significantly earlier and lasted longer in  
173 chimeric co-cultures, their slopes were also significantly less steep than those of H100  
174 samples (S4A Fig). These results indicate an earlier onset of synaptic signaling gene  
175 activation yet a slower rate of upregulation. Taken together, we found that co-culturing  
176 human and mouse cells during neural differentiation upregulated genes associated with  
177 neuron maturation and synapse formation earlier than human cells alone.

178



179 **Regulation of peak gene expression profiles occurs more rapidly in co-cultures with**  
180 **mouse stem cells.**

181 During development, genes involved in neural differentiation are often not simply  
182 turned on, but rather are expressed in temporally-regulated dynamic patterns<sup>23,24</sup>. To  
183 determine if genes with coordinated expression profiles were regulated more quickly,  
184 we next tested whether genes with peak expression profiles (consecutive up-down or  
185 up-flat segments) peaked earlier under chimeric versus human control conditions.

186

187 Overall, we identified 535 genes that peaked earlier (at least two days) (S1 File) in  
188 chimeric culture conditions compared to control samples, representing over 46% of all  
189 peaking genes identified in the time course (Fig. 4A). Similarly to early-upregulated  
190 genes, we recognized several peaking genes involved in neural development in the  
191 accelerated peak category (Fig. 4B and S3B Fig), including genes involved in  
192 neurogenesis (e.g. ASCL1, NGFR, NEFM, TUBB3), neural tube development (e.g. MEIS1,  
193 GLI3, DLL3), neuron signaling (e.g. SNAP25, ATCAY), and ventral midbrain differentiation  
194 (e.g. ISL1, LHX4, NKX6-1). We further validated that genes involved in  
195 neurodevelopment were specifically peaking early through GO-term enrichment  
196 analysis, and we found that all of the top ten most significantly enriched terms were  
197 associated with neural development (Fig. 4C). In contrast to early-upregulated genes  
198 which were enriched in neuron and synaptic signaling, early peaked genes were  
199 involved in neurogenesis, neuron projection development, and neuron differentiation  
200 (Fig. 4C-E). Further, whereas early-upregulated genes had a slower rate of increase

201 compared to control cells, early peaked genes exhibited an earlier time of start of  
202 upregulation towards the peak and a faster rate of upregulation to reach the peak (Fig.  
203 4D&E and S4B Fig.). Taken together, genes temporally regulated in peak profiles  
204 involved in neurogenesis and neuron differentiation peaked earlier in hES cells co-  
205 differentiated with mouse cells than human cells alone, and did so by beginning their  
206 upward trend towards the peak earlier and with a steeper slope.

207

208 **Chimeric co-culture affected timing and expressions levels of genes associated with**  
209 **neural cell type and brain region identity**

210 Our neural differentiation protocol recapitulates a general neural developmental  
211 program and produces neurons of various regional identities<sup>4</sup>. To determine if chimeric  
212 co-culture of hES cells would affect cell lineage outcomes, we identified genes that were  
213 most differentially expressed (S1 File) (measured as fold change between maximum  
214 expression along the time course) in chimeric mixed samples compared to hES cell  
215 controls (Fig. 5).

216

217 We observed some changes in the expression of transient signals as well as changes in  
218 sustained region-specific expression. Certain genes associated with the anterior dorsal  
219 neural tube and forebrain, glial cells, and the hippocampus showed down regulation in  
220 transient periods of gene expression in chimeric conditions compared to human control  
221 samples. Similarly, some genes associated with Gluta- and GABAergic neurons and  
222 neuron signal transduction showed patterns of sustained downregulation in the later

223 period of the time course (Fig. 5). Other genes associated with neurogenesis and axon  
224 migration show a mixture of these patterns. In contrast, some genes associated with the  
225 ventral midbrain showed transient upregulation in chimeric mixed samples compared to  
226 control samples (Fig. 5). Our analysis therefore revealed that some genes associated  
227 with neuron cell type and regional identity were temporally and/or differentially  
228 expressed under chimeric conditions.

229

### 230 **Acceleration effects are dose-dependent on percentage of mouse stem cells**

231 Having established significant patterns of altered neuron-associated expression  
232 between chimeric mixed samples and control samples, we decided to test the  
233 dependence of these results on the initial mixing proportion of human and mouse cells.  
234 To this end, we co-cultured human and mouse stem cells in an initial mixing proportion  
235 of 85% human and 15% mouse cells (H85) rather than 10% human and 90% mouse cells  
236 (H10) to determine if the acceleration effect was dose-dependent (Fig 6A). Sequencing  
237 data was collected in triplicate on the same schedule as for the H10, H100, and M100  
238 samples. Identical quality control filtering and segmented regression (Trendy) on the  
239 H85 time course produced a dataset directly comparable to the previous  
240 mixture/control samples (S2 File).

241

242 Overall, expression profiles of a selection of key neuronal genes with either early up-  
243 regulation or early peaks in H85 samples were between H10 and H100 expression  
244 profiles (Fig. 6B). Overlaying these trends with the expression profiles of orthologous

245 genes in the M100 sample reveals progressively later onsets of gene up-  
246 regulation/peaks with decreasing proportions of mouse cells among these genes (Fig.  
247 6B).

248

249 To determine whether these results extended to the broader set of neuron-associated  
250 genes, we replicated the GO-term enrichment analysis in the H85 sample. Testing term  
251 enrichment on those genes which either up-regulated or peaked earlier in H85 relative  
252 to H100 resulted in a list of the most significant terms with the same patterns as in H10.  
253 However, comparing term significance levels between the top 10 most significant terms  
254 in the H10 analysis and their H85 counterparts shows that, while the H85 terms were  
255 still highly significant, they were less so than the H10 terms (Fig. 6C).

256

257 Pairwise correlations allowed us to further aggregate relative expression trends across  
258 terms. We took a subset of genes, targeting those with dynamic expression over time,  
259 and plotted correlations calculated between pairs of time points relative to H100 (Fig.  
260 6D). Mouse orthologs demonstrate a visually significant acceleration with day 2  
261 expression being highly correlated with H100 out to day 16. The H10 and H85 time  
262 courses both show visual acceleration with regions of high correlation below the  
263 diagonal, but with respectively lower magnitudes as the proportion of mouse cells  
264 decreases.

265

266 These analyses suggest that not only were the acceleration effects independent of  
267 simple culture parameters, but moreover that the effects were dose-dependent on the  
268 starting proportion of interspecies factors driving the acceleration.

269

270 **Human stem cells co-cultured with mouse cells correlated with *in vivo* human fetal**  
271 **neocortical samples earlier than human cells alone.**

272 We compared our data with human fetal sample references to assess if our *in vitro*  
273 acceleration is consistent with sample maturity *in utero*. The *Brain Span* database  
274 contains expression profiles from annotated brain regions across a range of  
275 developmental ages<sup>25–27</sup>. We calculated correlations between our observed *in vitro*  
276 data and five tissue regions from the *Brain Span* database across weeks 8, 9, and 12 of  
277 development (see statistical methods for details). Across all time points and tissues, our  
278 mixed H10 and H85 samples increased correlation with the *Brain Span* reference earlier  
279 than the H100 control in a manner that was dose-dependent (Fig. 7).

280

281 These results were confirmed through a similar analysis of annotated brain tissue from  
282 the *Human Protein Atlas*<sup>28,29</sup> (S5 Fig.). As with the *Brain Span* data, higher proportions  
283 of mouse cells in the mixed samples resulted in earlier correlation with *in vivo* samples  
284 (S5 Fig.). These results are consistent with a genome-wide neural program that is  
285 activated earliest in M100, then significantly accelerated in H10, followed by moderately  
286 earlier in H85, and latest in H100 samples.

287

## 288 **DISCUSSION**

289 In this study, we report for the first time multifaceted effects of interspecies mixing on  
290 the differentiation of hES cells. Through comprehensive RNA-seq time courses, we  
291 uncover that co-differentiation of hES cells intermixed with mEpiS cells was sufficient to  
292 accelerate components of neural gene regulatory programs, and identified genes with  
293 roles in neural lineage and regional identities that were both temporally and  
294 differentially expressed. We went on to demonstrate that the acceleration effect was  
295 dose-dependent on the starting ratio of interspecies cells (Fig. 6), and that the  
296 quickened expression patterns in chimeric samples correlated to *in vivo* tissue samples  
297 earlier in the differentiation time course than human samples alone (Fig. 7 and S5 Fig).  
298  
299 Accelerated neural developmental programs were indicated by earlier up-regulation of  
300 genes involved in neural migration and synaptic signaling (Fig. 3), as well as accelerated  
301 regulation of peak expression profiles of genes involved in neurogenesis (Fig. 4).  
302 Previously, we reported that the faster differentiation of mouse cells compared to  
303 human cells may be in part caused by increased speed of transcriptional upregulation of  
304 genes, indicated by steeper slopes in gene expression over time<sup>30</sup>. Consistent with a  
305 mouse cell-induced acceleration of human cell neural differentiation, here we found  
306 that the slopes of peaked genes in human cells co-differentiated with mouse cells were  
307 also significantly increased in accelerated genes compared to control samples (S4B Fig.).  
308 However, non-peaking, mostly monotonic, genes whose upregulation began earlier  
309 showed lower slopes in chimeric samples, despite starting their upward trend

310 significantly earlier and often continuing upwards for the duration of the time course  
311 (S4A Fig.). These results may suggest different functional roles of early-upregulated  
312 monotonic genes compared to genes with peak expression profiles. Indeed, genes with  
313 increased slopes and earlier peaks were significantly enriched in processes of generation  
314 of neurons and neuron cell projections, whereas earlier upregulated monotonic gene  
315 trends with lesser slopes were enriched in neuron and synaptic signaling events.  
316 Although we identify differences in gene expression profiles in our time course in this  
317 report, the functional maturity of resulting neurons in control versus chimeric co-  
318 differentiation conditions remains to be determined.

319

320 The mechanisms responsible for both the developmental clock and how interspecies co-  
321 culture may affect the differentiation speed of another species remain unknown.  
322 Recently, *in vitro* models of mouse and human segmentation clocks with species-specific  
323 timing has been reported<sup>31-34</sup>. Although the driver of a universal developmental clock  
324 for all tissues is unknown, it has been speculated that, in the case of the segmentation  
325 clock, differences in *HES7* gene expression and protein degradation rates control  
326 oscillation frequencies that drive the rate of somitogenesis. It has been proposed that  
327 metabolic and biochemical reaction rates in cells of different species might modulate  
328 developmental rates<sup>35</sup>. Here, we show that cell-cell signaling alone is sufficient to affect  
329 the developmental clock.

330

331 Previously, several studies suggested that the intrinsic species-specific developmental  
332 timer was faithfully retained under various conditions. First, the intrinsic developmental  
333 clock seemed independent of culture method as both 2D culture and 3D organoid  
334 systems exhibited similarly robust retention of developmental time<sup>9,10,36–38</sup>. Second,  
335 several chimeric transplant/implantation studies also suggested the retention of  
336 developmental time of the species of origin rather than the host. For example, earlier  
337 our group reported that the developmental rate of hES cell-generated teratomas strictly  
338 retained human developmental time despite being grown in a mouse host<sup>4</sup>. Multiple  
339 other labs have also reported that transplantation of hES cell-derived neural progenitor  
340 cells into mouse brains was insufficient to accelerate the timing of human neural  
341 maturation<sup>6,7,10</sup>. Previous *in vitro* interspecies co-culture of stem cell-derived neural  
342 cells from different primate species failed to demonstrate deviation from intrinsic  
343 developmental properties in one study, however the mixed progenitor cells in this  
344 instance were already well differentiated towards neural cell types<sup>39</sup>. While these  
345 studies revealed that non-embryonic interspecies conditions were insufficient to alter  
346 developmental time, in this study we demonstrate that factors actively driving an  
347 embryonic developmental program from pluripotency, rather than a mature host  
348 environment, can be sufficient to affect components of the developmental clock of cells  
349 from another species.

350

351 The ability of stem cells of different species to resolve conflicting developmental speeds  
352 has significant implications in the development of chimeric embryos for human organ



353 formation<sup>40</sup>. With a widespread shortage of immunologically-matched organs for  
354 patients in need of organ transplants, the ability to grow transplantable human organs  
355 through human stem cell chimeric contributions to embryos remains an interesting  
356 potential therapeutic approach<sup>41,42</sup>. However, many barriers remain, including poor  
357 human chimeric contributions, possibly in part due to the vastly different  
358 developmental rates between neighboring cells of different species<sup>11,40,43</sup>. In this study,  
359 we demonstrate that it is possible for mouse cells to influence developmental rates and  
360 outcomes of neighboring human cells.

361

362 Previous reports of successful human cell contributions to chimeric mammalian  
363 embryos<sup>41,44,45</sup>, including a recent report of the highest contribution (4%) of human cells  
364 in mouse-human chimeric embryos<sup>46</sup>, could imply that human pluripotent stem cells  
365 may be induced to accelerate their developmental rate to match that of their embryonic  
366 host species. However, maturation rates of human cells in interspecies chimeras have  
367 not been well characterized. Our comprehensive time course results in this study  
368 indicate that human developmental time could be accelerated by co-differentiating cells  
369 within chimeric embryos, although collateral impacts in cell lineage outcomes may  
370 occur. In the case of neural differentiation in this study, we did find genes involved in  
371 dorsal forebrain development, for example, that were temporally downregulated in  
372 interspecies samples while genes involved in ventral midbrain development were  
373 upregulated, likely, at least in part, due to an earlier and increased exposure to SHH  
374 (Figs. 3-5)<sup>47-49</sup>. Importantly, mouse and human brains do not share identical brain

375 physiologies, cell type compositions, nor brain region proportions<sup>50,51</sup>, so it is perhaps  
376 not surprising that altered cell fate choices are made when cells are exposed to signals  
377 intended to create divergent outcomes. Thus, it will be important to monitor cell  
378 outcomes in chimeric embryos for human organ growth to verify that cell type  
379 contributions and organ functions are not affected.

380

381 Although the protocol described here will not have clinical applications due to the  
382 xenotropic nature of the conditions, it does suggest that the human developmental  
383 clock can be accelerated. Although the specific factors involved and clock mechanism  
384 itself remain to be dissected, this proof-of-concept report provides evidence that the  
385 species-specific developmental clock may be amenable to acceleration for clinically-  
386 relevant benefit.

387

## 388 **Materials & Methods**

### 389 **Cell culture**

390 Human ES and mEpiS cells were cultured and passaged as previously reported<sup>4</sup>. Briefly,  
391 H9 cells were cultured in E8 Medium (Thermo Fisher Scientific, USA) on Matrigel-coated  
392 plates and split every 2-3 days with EDTA. To easily identify human from mouse cells, H9  
393 cells were electroporated with a selectable PiggyBAC-inserted plasmid expressing  
394 nuclear-localized H2B-mCherry driven by the EF1 $\alpha$  promoter, and clonally expanded.

395

396 EGFP-expressing mEpiS cells derived from C57BL/6-Tg(CAG-EGFP)10sb/J (JAX Stock No.  
397 003291) mice and cultured as previously described<sup>4,19,21</sup>. Cells were maintained on low  
398 passage MEFs and cultured in DMEM/F12 medium (Thermo Fisher Scientific, USA)  
399 supplemented with 20% Knockout serum replacement (Thermo Fisher Scientific, USA),  
400 0,18 mM B-mercaptoethanol (Sigma, USA), 1X non-essential amino acids (Thermo Fisher  
401 Scientific, USA), 2 mM L-glutamine (Sigma, USA), 7.5 ng/mL activin A (R&D Systems,  
402 USA), and 5ng/mL bFGF (R&D Systems, USA). Cells were passaged by adding TrypLE  
403 (Thermo Fisher Scientific, USA) and seeding onto fresh MEFs with 10  $\mu$ M Y27632 ROCK  
404 inhibitor overnight to increase cell survival (Tocris Bioscience, UK).

405

#### 406 **Neural induction and sampling for RNA-seq**

407 At day 0 of time courses, H9-H2BmCherry and EGFP-mEpiS cells were washed with PBS  
408 (Thermo Fisher Scientific, USA), treated with TrypLE (Thermo Fisher Scientific, USA) for  
409 singularization, and resuspended in a simple neural differentiation medium consisting of  
410 DF3S (DMEM/F-12, L-ascorbic acid-2-phosphate magnesium (64 mg/L), sodium selenium  
411 (14  $\mu$ g/L), and NaHCO<sub>3</sub> (543 mg/L), Thermo Fisher Scientific, USA), 1X N2 supplement  
412 (Thermo Fisher Scientific, USA), 1XB27 supplement (Thermo Fisher Scientific, USA), and  
413 100ng/mL of mNoggin (R&D Systems, USA). To aid cell survival, 10  $\mu$ M Y27632 ROCK  
414 inhibitor (Tocris Bioscience, UK) was added on day 0, and cells were mixed at the  
415 indicate mouse-human ratios and seeded into Matrigel-coated 12-well plates at  $2.5 \times 10^5$   
416 cells/well in triplicate. Media in all wells was replaced with fresh neural differentiation  
417 media (without ROCK inhibitor) every day for the 42 days of differentiation. When cells

418 become over-confluent cells were split 1:3 or 1:6 by EDTA-treatment to avoid disrupting  
419 cell-cell interactions.

420

#### 421 **Flow Cytometry, Microscopy, and Time Lapse Imaging**

422 Human-mouse cell ratios were established by monitoring red and green fluorescence,  
423 respectively, by flow cytometry. Cells were treated with 350 $\mu$ L TryPLE, spun down, and  
424 resuspended in 400  $\mu$ L FACS buffer (PBS + 5% Bovine Serum Albumin). Cells were  
425 analyzed on a BD FACSCanto II and analyzed using FlowJo 9.3 software (Becton  
426 Dickinson & Company, USA).

427

428 All time-lapse microscopy was acquired on a BioStation CT automated imaging system  
429 (Nikon Instruments, Japan). Samples from all conditions were imaged at least every  
430 other day using phase-contrast and fluorescence microscopy. For time-lapse movies,  
431 cells were acquired with a 10X magnifying objective every 30 minutes for the first 6 days  
432 of differentiation in phase-contrast and green and red fluorescence channels. Overlaid  
433 movies were compiled with CL-Quant software (DRVision, USA).

434

#### 435 **Sample processing and RNA-seq pipeline**

436 For RNA sample collection, samples were washed with 1XPBS (Thermo Fisher Scientific,  
437 USA) and lysed in 700  $\mu$ L RLT-PLUS buffer (Qiagen, USA), and stored at -80C until further  
438 processing. Total RNA was then purified from 350  $\mu$ L RLT-Plus Buffer using RNeasy Plus  
439 96 and Micro Kits (Qiagen, Netherlands) and quantitated with the Quant-iT RNA Assay

440 Kit (Thermofisher, USA). RNA was diluted to one hundred nanograms for input. The  
441 Ligation-Mediated Sequencing (LM-Seq) protocol was used to prepare and index all  
442 cDNA libraries (Hou et al 2015). Final cDNA libraries were quantitated with the Quant-iT  
443 PicoGreen Assay Kit (Thermofisher, USA). Twenty-five to forty-eight uniquely indexed  
444 samples were pooled per lane on an Illumina HiSeq 2500 with a single 51 base pair read  
445 and a 10 base pair index read.  
446  
447 A joint hg19/mm10 transcriptome reference was built by appending hg19 or mm10  
448 respectively to the chromosome sequences and gene symbols. Tagging the gene  
449 symbols with the ID of the reference genome ensured easy decomposition of the  
450 resulting expression estimates into mouse and human subsets of species-specific gene  
451 expression. Mitochondrial genes were removed prior to further downstream analysis or  
452 normalization due to their inconsistent abundance across samples.  
453  
454 The sequencer outputs were processed using Illumina's CASAVA-1.8.2 base calling  
455 software. Sequences were filtered and trimmed to remove low quality reads, adapters,  
456 and other sequencing artifacts. The remaining reads were aligned to the joint  
457 transcriptome using RSEM version 1.2.3 with bowtie-0.12.9 for the alignment step. After  
458 ensuring accurate mapping to the human/mouse subset of the transcriptome (see  
459 below for details), identified by the respective hg19 and mm10 tags on the gene symbol,  
460 the human and mouse subsets of expected counts were separated for individual  
461 analysis.

462

463 **Mixed species sample quality control**

464 To assess the quality of alignment to the combined human-mouse transcriptome,  
465 misalignment rates were quantified in the H100 (pure human) and M100 (pure mouse)  
466 samples. In these cases, transcripts which align to the mouse and human subset of the  
467 transcriptome respectively represent errors of misalignment. Typical misalignment  
468 rates across samples appeared to be well controlled as the majority of H100 samples  
469 aligned less than 0.5% of transcripts to mouse genes (median ~0.35%, third quartile  
470 ~0.37%). The majority of M100 samples similarly aligned less than 1.5% of transcripts to  
471 human genes (median ~0.53%, third quartile ~1.42%) (S2 Fig.).

472

473 A few samples (~5%) exhibited high misalignment rates (>5%). For this reason, samples  
474 with unusually low sequencing depth were removed. The filtering criteria considered  
475 log<sub>10</sub> transformed sequencing depth (within sample sum of total expression) and  
476 removed samples with depth below the median minus 1.5 times the IQR. This procedure  
477 removed the majority of individual samples in H100 and M100 with high alignment error  
478 rates. Therefore, misalignment is believed to be primarily a function of, or at least well  
479 predicted by, low sequencing depth (S2 Fig.).

480

481 A second filter was implemented to remove samples with expression profiles  
482 significantly different from biological replicates of the same time point and temporally  
483 neighboring samples. Normalized data (see below for details) from the top 1000 highest

484 variance genes across samples within each mixture was reduced to 10 principal  
485 components. This number roughly accounts for the majority of temporal variability  
486 based on the variance explained by each component. Loadings for each component  
487 were expected to follow a smooth curve in time, following the portion of the  
488 developmental trajectory defined by the principal component. For this reason, loadings  
489 were fitted with a 4<sup>th</sup> degree spline regressed against time. Studentized residuals were  
490 tested for being significantly different than the regression curve. A sample level p-value  
491 was derived by testing against the null distribution that the maximum residual across  
492 the 10 components (in absolute value) was t-distributed. The method of Benjamini and  
493 Hochberg<sup>52</sup> was used to provide adjusted p-values. A backward elimination and forward  
494 selection procedure was then applied. Specifically, the sample with the smallest  
495 adjusted p-value below 1e-05 was removed and the process repeated until no samples  
496 had an adjusted p-value below 1e-05 (if a sample is the last remaining observation from  
497 a particular time point, it was not considered for removal regardless of its adjusted p-  
498 value). Samples were then added back in one-at-a-time in the order of removal. Any  
499 with adjusted p-values above 1e-05 were retained for further analysis, and otherwise  
500 were rejected permanently. The filtered dataset was renormalized prior to analysis.  
501  
502 Empirically, this procedure was shown to remove several remaining high-error samples  
503 from M100 without removing high sequencing depth samples across species mixture  
504 groups (S2 Fig.).  
505

506 **Normalization of mixed species samples**

507 We used a modified application of the scran<sup>53</sup> method for normalization of the expected  
508 count data. Human and mouse aligned transcripts were normalized separately, and so  
509 relative levels of normalized expression were not directly comparable between species.  
510 Consider the human mixtures (H10, H85, or H100); mouse mixtures were normalized  
511 identically. When biological replicates existed for a time point, scran was first applied to  
512 normalize these samples. Average normalized expression of biological replicates was  
513 then normalized, again via scran, across both time points and mixtures.

514

515 **Segmented regression and gene-trend classification**

516 The dynamics of gene expression through time were defined by a segmented regression  
517 implemented using the Trendy<sup>22</sup> package. Trendy automatically selects the optimal  
518 number of segments (up to a maximum of 5 in this application) and requires that each  
519 segment contain a minimum number of samples (5 in this application). Additionally, an  
520 automatic significance test on segment slopes classifies segments as increasing,  
521 decreasing, or flat. As the test is itself somewhat conservative, we used a significance  
522 threshold of 0.1 (default) to determine these slope classifications. Trendy was then  
523 applied to all genes for which the 80% quantile of normalized expression is above 20 for  
524 at least one mixture.

525

526 Following regression, the segment trend classifications were used to define sets of  
527 genes by patterns of behavior relative to a reference dataset (H100 in the majority of



528 the published analysis). Genes were classified into subsets of accelerated or  
529 differentially expressed (DE) relative to the reference dataset according to the following  
530 criteria:

531 1. Accelerated by Early Up (EU):

- 532 a. Both the test gene and the reference gene contain an increasing segment  
533 which is not preceded by a decreasing segment. If multiple such  
534 segments exist, only the first is considered.
- 535 b. The increasing segment in the test gene must start at least 2 days before  
536 the increasing segment in the reference gene.
- 537 c. The slope of the increasing segment in the test gene must be at least 5  
538 times the slope of the (non-increasing) reference segment which contains  
539 the start time of the test increasing segment (typically the segment just  
540 prior to the increasing reference segment). This filter removes genes for  
541 which the reference segment containing the start time is labeled as flat  
542 by Trendy (slope is not significantly different from 0), but is fitted with an  
543 up-trending slope. This can happen in instances where the reference  
544 segment is short and so does not contain enough sample points for the  
545 up-trend to be labeled as significant.

546 2. Accelerated by Early Peak (EP):

- 547 a. Both the test gene and the reference gene contain a peak defined by an  
548 increasing segment followed by a flat or decreasing segment. The peak

- 549                   itself is defined by the time of the breakpoint between these two  
550                   segments.
- 551                   b. The peak in the test gene must be at least 2 days before the peak in the  
552                   reference gene.
- 553           3. DE Up:
- 554                   a. The maximum fitted value of the test gene plus 1 must be at least 3 times  
555                   the maximum fitted value of the reference gene plus 1. The inclusion of  
556                   the plus 1 bias to each side prevents very lowly expressing genes from  
557                   appearing DE due to small differences in fitted values which are only  
558                   multiplicatively large due to the low overall expression.

559 Genes in H10 or H85 matching these acceleration/up-regulation criteria were denoted  
560 as “Early” or “Up” respectively.

561

562 We also ran this classification denoting H100 as the test datasets. When genes matched  
563 the criteria in this case, we denoted the corresponding gene in the reference dataset,  
564 H10 or H85, “Late” or “Down” according to the specific criteria met.

565

### 566 **Gene set enrichment**

567 Accelerated and DE gene sets were further characterized through testing for GO term  
568 enrichment. The topGO<sup>54</sup> package and org.Hs.eg.db<sup>55</sup> dataset were used to perform  
569 enrichment testing on GO terms belonging to the biological processes (BP) ontology.  
570 The set of all genes on which Trendy segmented regression was run was used as the

571 background set (see above for subset definition). Significant p-values were then FDR  
572 corrected<sup>52</sup> prior to analysis.

573

#### 574 **Correlation analysis**

575 Expression similarity across time points, species mixtures, and external reference  
576 datasets was assessed through gene expression correlations. To ensure that computed  
577 correlations were representative of the temporal gene dynamics being studied,  
578 correlations were computed on only a subset of genes. Highly dynamic genes were  
579 subset from all Trendy-fit genes by calculating the coefficient of variation of fitted  
580 values. The highest CV across species mixtures was then retained as a measure of each  
581 gene's level of temporal dynamics, and the top 1000 most dynamic (highest CV) genes  
582 were subset for analysis.

583

584 Relative acceleration of species-mixtures was computed as the correlation matrix  
585 (spearman type) between time points where within-day technical replicates were  
586 averaged together to obtain a single day expression value.

587

588 Relative acceleration in combination with brain-region similarity on the species-mixture  
589 data was then separately validated/assessed through similar calculation of correlations  
590 between the species-mixture data and two outside datasets: the BrainSpan atlas of the  
591 developing human brain<sup>26,27</sup> and the Human protein atlas<sup>28,29</sup>.

592

593 **R package versions**

594 All calculations were performed using R<sup>56</sup> (v3.6.2) and major packages: Trendy<sup>22</sup> (v1.6.4),  
595 scran<sup>53</sup> (v1.12.1), topGO<sup>54</sup> (v2.36.0), org.Hs.eg.db<sup>55</sup> (v3.8.2), ggplot2<sup>57</sup> (v3.3.0).

596

597 **List of Abbreviations**

598 RNA-sequencing (RNA-seq); human embryonic stem (hES) cells; mouse epiblast stem  
599 (mEpiS) cells; Ligation-Mediated Sequencing (LM-Seq); Gene Ontology (GO)

600

601 **Declarations**

602 **Ethics approval and consent to participate**

603 All experiments described in this study were approved by the ethics committee with IRB  
604 Approval Number: SC-2015-0010. The H1 hES cells are registered in the NIH Human  
605 Embryonic Stem Cell Registry with the Approval Number NIHhESC-10-0043.

606

607 **Consent for publication**

608 Not applicable.

609

610 **Data Availability**

611 The RNA-seq datasets supporting the conclusions of this article are available (pending  
612 publication) in the Gene Expression Omnibus repository, GSE157354. The code for  
613 reproducible analyses and generation of figures and tables is available (pending  
614 publication) at <https://github.com/JBrownBiostat/ChimericDevelopment>.

615

616 **Competing Interests**

617 The authors declare that they have no competing interests.

618

619 **Funding**

620 Funding for this research was provided by U.S. National Institutes of

621 Health grant 1UH2TR000506-01 (to J.A.T.). C.B. was supported by a Canadian Institutes

622 for Health Research Banting postdoctoral fellowship award (Grant no. BPF-112938). J.B.

623 was supported by a National Library of Medicine Bio-Data Science Training program

624 (Grant no. T32LM012413). C.K. was supported by Grant no. NIHGM102756.

625

626 **Supporting information**

627 **S1 File. Summaries of expression characteristics for genes classified as exhibiting**

628 **differential timing or expression in H10.**

629 **S2 File. Summaries of expression characteristics for genes classified as exhibiting**

630 **differential timing or expression in H85.**

631 **S1 Movie:** H9-H2BmCherry (red) cells mixed 1:10 with EGFP+ mouse EpiS cells (green)

632 were seeded in neural differentiation medium and imaged every 30 mins for the first 6

633 days of differentiation using a Nikon BiostationCT imaging system. Condensation was

634 noted during the first images capture after media replacement approximately every 24

635 hours. Overlaid channels of microscopy images were compiled into the movie with CL-

636 Quant software (DRVision, USA).

637 **S1 Fig. Quality control filtering removes samples with uncharacteristically low**  
638 **sequencing depth.** (Top) Observed per-sample misalignment rates for pure human/pure  
639 mouse mixtures. (Middle/Bottom) Observed log<sub>10</sub> total sequencing depth summed across  
640 sequences aligned to either human or mouse. Most samples removed from analysis (blue)  
641 are below the depth filtering threshold (dashed line) (see statistical methods). Otherwise,  
642 the M100 results suggest that the higher-depth removed samples are those with higher  
643 rates of misalignment (top/middle, right column).

644 **S2 Fig. Seeded human cell proportions increase over time.** (A) Observed percent of  
645 human cells in H10 mixture out to 16 days. (B) FACS intensities used to compute relative  
646 proportions of human and mouse cells in H10 mixture.

647 **S3 Fig. Selected gene expression plots show characteristic differences between H100,**  
648 **H10, and M100.** (A) EU classified fitted trend lines (solid) are plotted for selected genes  
649 with overlaid normalized observed data (points). (B) Similar results are shown for  
650 selected EP classified genes.

651 **S4 Fig. Up-trends show defining shifts in H10 among EU and EP genes.** (A) Slope  
652 ratio (ratio of H10 up-trend slope over H100 up-trend slope) densities are plotted (left) on  
653 the log scale for top enriched GO terms. KS testing shows a significant left-shift  
654 corresponding to significantly reduced slopes in H10 among these genes. Densities of the  
655 duration of up-trends (right) show significantly longer (KS test) trends for H10 (red) than  
656 H100 (blue). (B) Similar results for EP genes show significant increases in slope in H10  
657 with reduced duration of up-trend.

658 **S5 Fig. Correlation with Human Protein Atlas (HPA) data further demonstrates**  
659 **dose response behaviors.** Correlations (Spearman) between fitted trends HPA data are

660 calculated across the thirteen HPA regions. Calculations are performed on a subset of  
661 highly dynamic genes (see statistical methods).

662

### 663 **Acknowledgements**

664 The authors would like to thank John Maufort for editorial assistance and critical reading  
665 of this manuscript.

666

### 667 **Author Contributions**

668 Conceptualization: Jared Brown, Christopher Barry, Matthew T. Schmitz, James A.

669 Thomson, Christina Kendzierski.

670 Data curation: Jared Brown, Matthew T. Schmitz, John Steill, Scott Swanson.

671 Formal analysis: Jared Brown, Christopher Barry, Matthew T. Schmitz, Michael Schwartz,  
672 and Christina Kendzierski.

673 Funding acquisition: James A. Thomson and Christina Kendzierski.

674 Investigation: Christopher Barry, Cara Argus, Jennifer M. Bolin, Amy Van Aartsen.

675 Methodology: Jared Brown, Christopher Barry, Matthew T. Schmitz, Scott Swanson,

676 Michael Schwartz, James A. Thomson, Christina Kendzierski.

677 Project administration: Christopher Barry and James A. Thomson.

678 Resources: Ron Stewart, James A. Thomson, and Christina Kendzierski.

679 Software: Jared Brown, John Steill, Scott Swanson, and Christina Kendzierski.

680 Supervision: Christopher Barry, James A. Thomson, and Christina Kendzierski.

681 Validation: Jared Brown, Christopher Barry, John Steill, Scott Swanson, Ron Stewart, and

682 Christina Kendzierski.

683 Visualization: Jared Brown, Christopher Barry, and Matthew T. Schmitz.

684 Writing – original draft: Jared Brown and Christopher Barry.

685 Writing – review & editing: Jared Brown, Christopher Barry, Matthew T. Schmitz,

686 Jennifer M. Bolin, John Steill, Scott Swanson, Ron Stewart, James A. Thomson, and

687 Christina Kendzierski.

688

## 689 **References**

- 690 1. Macdonald, D. & Barrett, P. *Mammals of Europe*. (Princeton University Press, 2002).
- 691 2. Estes, R. & Otte, D. *The behavior guide to African mammals : including hoofed mammals,*  
692 *carnivores, primates*. (University of California Press, 1991).
- 693 3. San Diego Zoo Animals and Plants. Available at: <https://animals.sandiegozoo.org/animals/>.  
694 (Accessed: 28th July 2020)
- 695 4. Barry, C. *et al.* Species-specific developmental timing is maintained by pluripotent stem cells ex  
696 utero. *Dev. Biol.* **423**, 101–110 (2017).
- 697 5. Kanton, S. *et al.* Organoid single-cell genomic atlas uncovers human-specific features of brain  
698 development. *Nature* **574**, (2019).
- 699 6. Espuny-Camacho, I. *et al.* Pyramidal Neurons Derived from Human Pluripotent Stem Cells  
700 Integrate Efficiently into Mouse Brain Circuits In Vivo. *Neuron* **77**, 440–456 (2013).
- 701 7. Maroof, A. M. *et al.* Directed differentiation and functional maturation of cortical interneurons  
702 from human embryonic stem cells. *Cell Stem Cell* **12**, 559–572 (2013).
- 703 8. Gaspard, N. *et al.* An intrinsic mechanism of corticogenesis from embryonic stem cells. *Nature*  
704 **455**, 351–357 (2008).
- 705 9. Pollen, A. A. *et al.* Establishing Cerebral Organoids as Models of Human-Specific Brain Evolution.



- 706            *Cell* **176**, 743–756.e17 (2019).
- 707    10.    Nicholas, C. R. *et al.* Functional maturation of hPSC-derived forebrain interneurons requires an  
708            extended timeline and mimics human neural development. *Cell Stem Cell* **12**, 573–586 (2013).
- 709    11.    Ebisuya, M. & Briscoe, J. What does time mean in development? *Dev.* **145**, 0–3 (2018).
- 710    12.    Saha, K. & Jaenisch, R. Technical Challenges in Using Human Induced Pluripotent Stem Cells to  
711            Model Disease. *Cell Stem Cell* **5**, 584–595 (2009).
- 712    13.    Broccoli, V., Giannelli, S. G. & Mazzara, P. G. Modeling physiological and pathological human  
713            neurogenesis in the dish. *Front. Neurosci.* **8**, 1–9 (2014).
- 714    14.    Ying, Q. L., Stavridis, M., Griffiths, D., Li, M. & Smith, A. Conversion of embryonic stem cells into  
715            neuroectodermal precursors in adherent monoculture. *Nat. Biotechnol.* **21**, 183–186 (2003).
- 716    15.    Shen, Q. *et al.* The timing of cortical neurogenesis is encoded within lineages of individual  
717            progenitor cells. *Nat. Neurosci.* **9**, 743–751 (2006).
- 718    16.    Chuang, J. H., Tung, L. C., Yin, Y. & Lin, Y. Differentiation of glutamatergic neurons from mouse  
719            embryonic stem cells requires raptor S6K signaling. *Stem Cell Res.* **11**, 1117–1128 (2013).
- 720    17.    Sun, N. *et al.* Inference of differentiation time for single cell transcriptomes using cell population  
721            reference data. *Nat. Commun.* **8**, 1–12 (2017).
- 722    18.    Shi, Y., Kirwan, P., Smith, J., Robinson, H. P. C. & Livesey, F. J. Human cerebral cortex development  
723            from pluripotent stem cells to functional excitatory synapses. *Nat. Neurosci.* **15**, 477–486 (2012).
- 724    19.    Brons, I. G. M. *et al.* Derivation of pluripotent epiblast stem cells from mammalian embryos.  
725            *Nature* **448**, 191–195 (2007).
- 726    20.    Greber, B. *et al.* Conserved and Divergent Roles of FGF Signaling in Mouse Epiblast Stem Cells and  
727            Human Embryonic Stem Cells. *Cell Stem Cell* **6**, 215–226 (2010).
- 728    21.    Tesar, P. J. *et al.* New cell lines from mouse epiblast share defining features with human  
729            embryonic stem cells. *Nature* **448**, 196–199 (2007).
- 730    22.    Bacher, R. *et al.* Trendy: Segmented regression analysis of expression dynamics in high-throughput  
731            ordered profiling experiments. *BMC Bioinformatics* **19**, 1–10 (2018).
- 732    23.    Gurok, U. *et al.* Gene expression changes in the course of neural progenitor cell differentiation. *J.*

- 733            *Neurosci.* **24**, 5982–6002 (2004).
- 734    24.    van de Leemput, J. *et al.* CORTECON: A temporal transcriptome analysis of in vitro human cerebral  
735            cortex development from human embryonic stem cells. *Neuron* **83**, 51–68 (2014).
- 736    25.    Sunkin, S. M. *et al.* Allen Brain Atlas: An integrated spatio-temporal portal for exploring the central  
737            nervous system. *Nucleic Acids Res.* **41**, (2013).
- 738    26.    Miller, J. A. *et al.* Transcriptional landscape of the prenatal human brain. *Nature* **508**, 199–206  
739            (2014).
- 740    27.    BrainSpan Atlas of the Developing Human Brain. *Allen Institute for Brain Science* (2010). Available  
741            at: [www.brainspan.org](http://www.brainspan.org).
- 742    28.    Yu, N. Y. L. *et al.* Complementing tissue characterization by integrating transcriptome profiling  
743            from the human protein atlas and from the FANTOM5 consortium. *Nucleic Acids Res.* **43**, 6787–  
744            6798 (2015).
- 745    29.    RNA FANTOM brain region gene data. *The Human Protein Atlas* Available at:  
746            [www.proteinatlas.org](http://www.proteinatlas.org).
- 747    30.    Barry, C. *et al.* Automated minute scale RNA-seq of pluripotent stem cell differentiation reveals  
748            early divergence of human and mouse gene expression kinetics. *PLoS Comput. Biol.* **15**, 1–24  
749            (2019).
- 750    31.    Matsumiya, M., Tomita, T., Yoshioka-Kobayashi, K., Isomura, A. & Kageyama, R. Es cell-derived  
751            presomitic mesoderm-like tissues for analysis of synchronized oscillations in the segmentation  
752            clock. *Dev.* **145**, (2018).
- 753    32.    Chu, L. F. *et al.* An In Vitro Human Segmentation Clock Model Derived from Embryonic Stem Cells.  
754            *Cell Rep.* **28**, 2247-2255.e5 (2019).
- 755    33.    Matsuda, M. *et al.* Recapitulating the human segmentation clock with pluripotent stem cells.  
756            *Nature* **580**, 124–129 (2020).
- 757    34.    Diaz-Cuadros, M. *et al.* In vitro characterization of the human segmentation clock. *Nature* **580**,  
758            113–118 (2020).
- 759    35.    Miyazawa, H. & Aulehla, A. Revisiting the role of metabolism during development. *Dev.* **145**,

- 760 (2018).
- 761 36. Arlotta, P. *et al.* Species-specific maturation profiles of human, chimpanzee and bonobo neural  
762 cells. *Elife* **8**, e37527 (2019).
- 763 37. Lancaster, M. A. *et al.* Cerebral organoids model human brain development and microcephaly.  
764 *Nature* **501**, 373–379 (2013).
- 765 38. Kelava, I. & Lancaster, M. A. Stem Cell Models of Human Brain Development. *Cell Stem Cell* **18**,  
766 736–748 (2016).
- 767 39. Otani, T., Marchetto, M. C., Gage, F. H., Simons, B. D. & Livesey, F. J. 2D and 3D Stem Cell Models  
768 of Primate Cortical Development Identify Species-Specific Differences in Progenitor Behavior  
769 Contributing to Brain Size. *Cell Stem Cell* **18**, 467–480 (2016).
- 770 40. De Los Angeles, A., Pho, N. & Redmond, D. E. Generating human organs via interspecies chimera  
771 formation: Advances and barriers. *Yale J. Biol. Med.* **91**, 333–342 (2018).
- 772 41. Wu, J. *et al.* Interspecies Chimerism with Mammalian Pluripotent Stem Cells. *Cell* **168**, 473-  
773 486.e15 (2017).
- 774 42. Das, S. *et al.* Generation of human endothelium in pig embryos deficient in ETV2. *Nat. Biotechnol.*  
775 **38**, 297–302 (2020).
- 776 43. Masaki, H. *et al.* Interspecific in vitro assay for the chimera-forming ability of human pluripotent  
777 stem cells. *Dev.* **142**, 3222–3230 (2015).
- 778 44. Mascetti, V. L. & Pedersen, R. A. Human-Mouse Chimerism Validates Human Stem Cell  
779 Pluripotency. *Cell Stem Cell* **18**, 67–72 (2016).
- 780 45. Yang, Y. *et al.* Derivation of Pluripotent Stem Cells with In Vivo Embryonic and Extraembryonic  
781 Potency. *Cell* **169**, 243-257.e25 (2017).
- 782 46. Hu, Z. *et al.* Transient inhibition of mTOR in human pluripotent stem cells enables robust  
783 formation of mouse-human chimeric embryos. *Sci. Adv.* **6**, 1–17 (2020).
- 784 47. Placzek, M. & Furley, A. Neural development: Patterning cascades in the neural tube. *Curr. Biol.* **6**,  
785 526–529 (1996).
- 786 48. Dale, J. K. *et al.* Cooperation of BMP7 and SHH in the induction of forebrain ventral midline cells

- 787 by prechordal mesoderm. *Cell* **90**, 257–269 (1997).
- 788 49. Lupo, G., Harris, W. A. & Lewis, K. E. Mechanisms of ventral patterning in the vertebrate nervous  
789 system. *Nat. Rev. Neurosci.* **7**, 103–114 (2006).
- 790 50. Hodge, R. D. *et al.* Conserved cell types with divergent features in human versus mouse cortex.  
791 *Nature* **573**, 61–68 (2019).
- 792 51. Sjöstedt, E. *et al.* An atlas of the protein-coding genes in the human, pig, and mouse brain. *Science*  
793 *(80-. )*. **367**, eaay5947 (2020).
- 794 52. Hochberg, Y. Controlling the False Discovery Rate : A Practical and Powerful Approach to Multiple  
795 Testing Author ( s ): Yoav Benjamini and Yosef Hochberg Source : Journal of the Royal Statistical  
796 Society . Series B ( Methodological ), Vol . 57 , No . 1 ( 1995 ), Publi. **57**, 289–300 (2016).
- 797 53. Lun, A. T. L., Bach, K. & Marioni, J. C. Pooling across cells to normalize single-cell RNA sequencing  
798 data with many zero counts. *Genome Biol.* **17**, 1–14 (2016).
- 799 54. Alexa, A., Rahnenführer, J. & Lengauer, T. Improved scoring of functional groups from gene  
800 expression data by decorrelating GO graph structure. *Bioinformatics* **22**, 1600–1607 (2006).
- 801 55. Carlson, M. *org.Hs.eg.db: Genome wide annotation for Human.* (2019).
- 802 56. R Core Team. R: A Language and Environment for Statistical Computing. (2019).
- 803 57. Wickham, H. *ggplot2: Elegant Graphics for Data Analysis.* (Springer-Verlag, 2016).
- 804

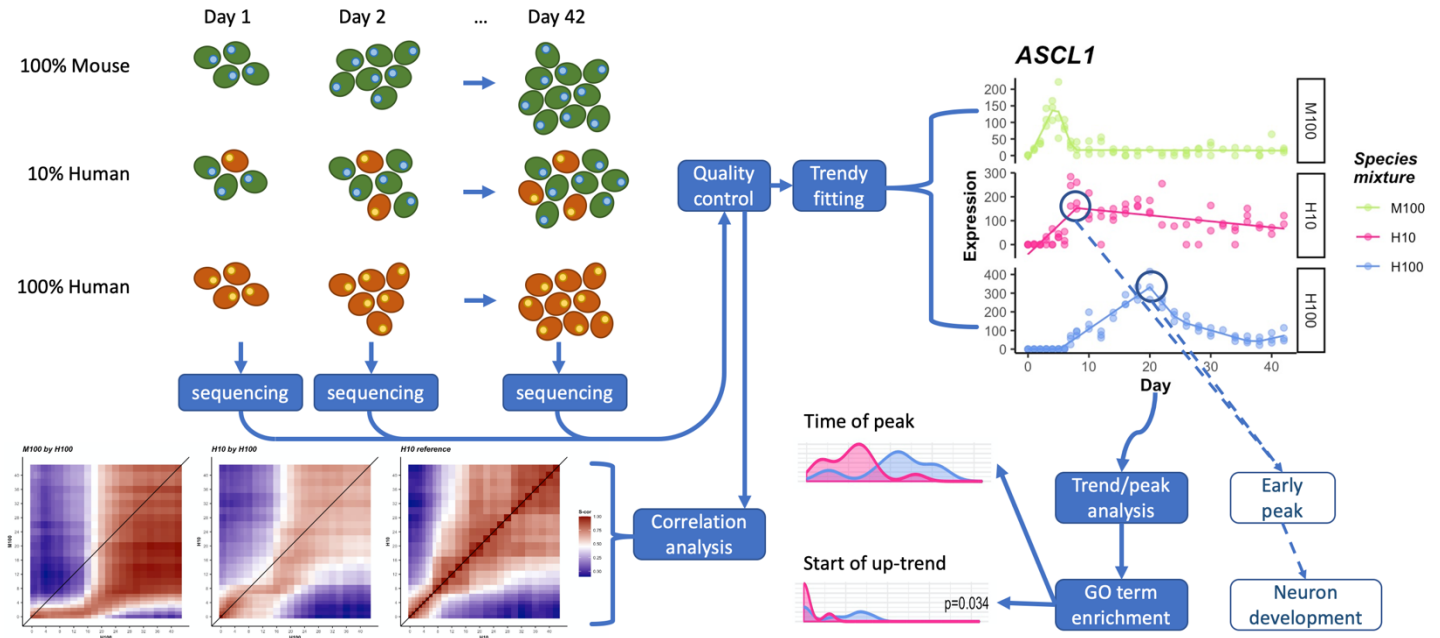

Figure 1: Overview of data collection/analysis pipeline. (top left) Human (red) and mouse (green) cells are cultured in various mixing proportions over the course of 42 days. Every 1-2 days, tissue samples are taken from each time course and sequenced to generate three time-courses of RNA expression data. Low quality biological replicates are removed from analysis and the data are normalized. (top right) Normalized data are fit to segmented regression built for RNAseq data (Trendy) and temporal gene characteristics, such as peak times, are identified. (bottom right) Classified gene sets are passed on for further analysis, in particular, enrichment analysis for GO terms which are temporally accelerated or otherwise systematically altered in H10 compared to H100. (bottom left) In parallel to the previous analysis, normalized data are also correlated between time courses to identify transcriptome-wide effects. Additionally, normalized data are correlated with in-vivo sequencing data from human neural tissue of known age and origin (shown in Fig 7, Supp. Fig 5).

805

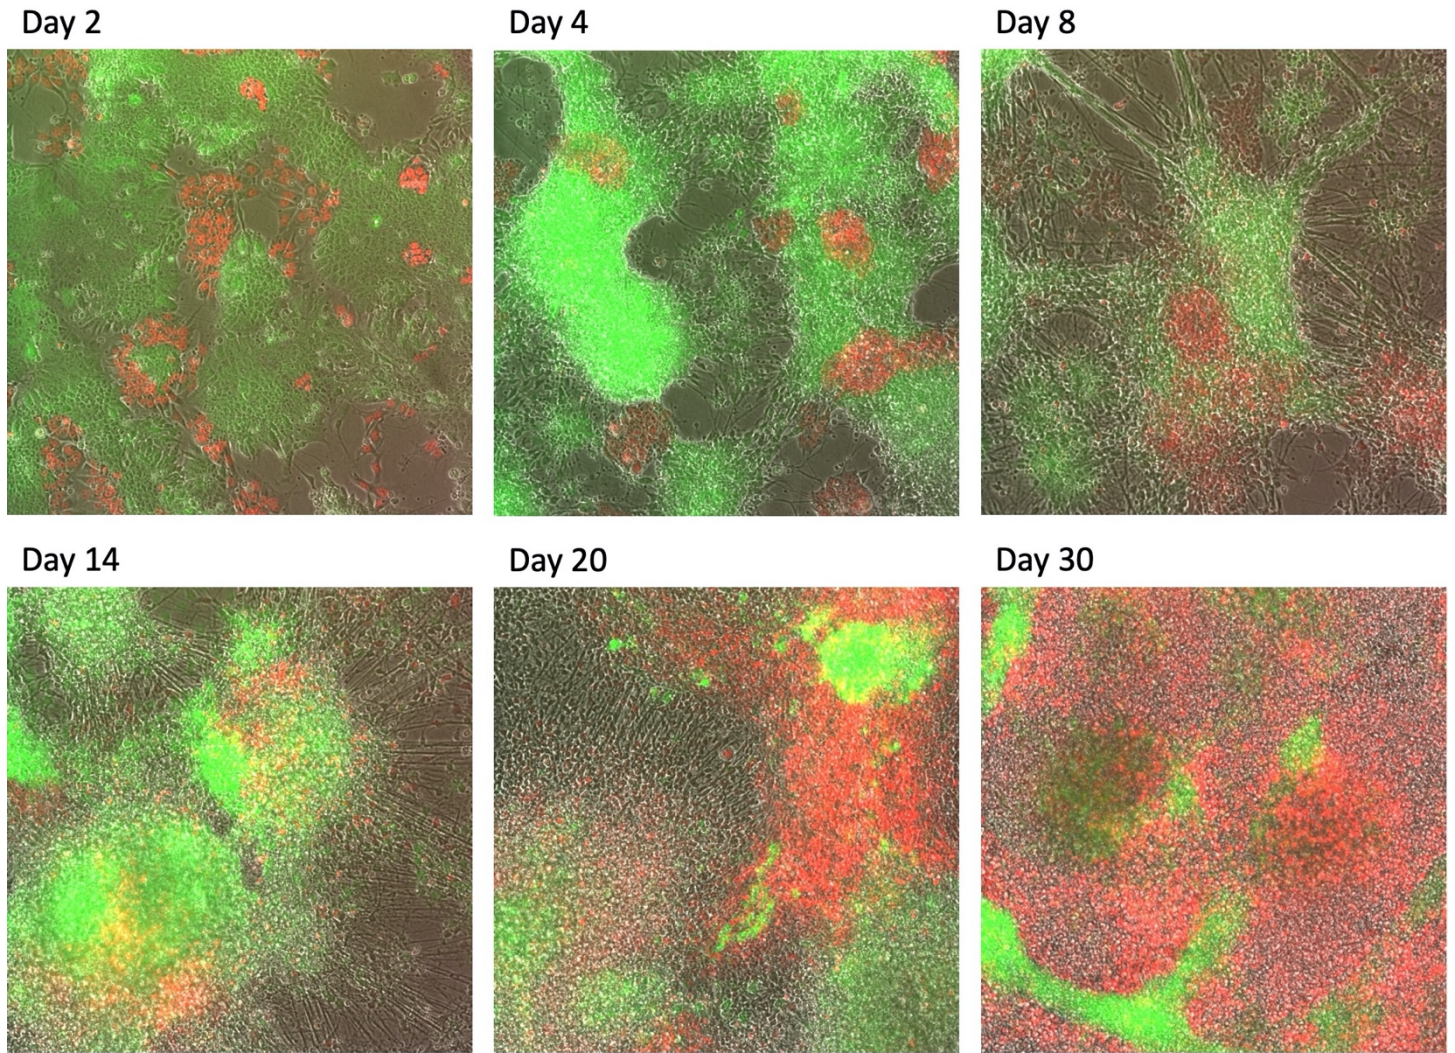

Figure 2: microscopy snapshots of the H10 mixture across the time course. Human cell (H9 cell line) express nuclear-localized H2B-mCherry and so fluoresce red (see methods for details). Mouse cells (cell line derived from C57BL/6-Tg(CAG-EGFP)10sb/J mice) express EGFP and so fluoresce green (see methods for details). Mouse cells are observed to rapidly differentiate into post-mitotic neurons out to days 8-14. Still differentiating human cells, however, divide at rates after day 8 which quickly sees human cells dominating the human/mouse cell ratio, despite the initial seeding of only 10% human. The simultaneous grouping of human and mouse cells (red and green clusters respectively) suggests preferential association. However, the boundaries between species clusters demonstrate non-zero overlap and interaction.

806

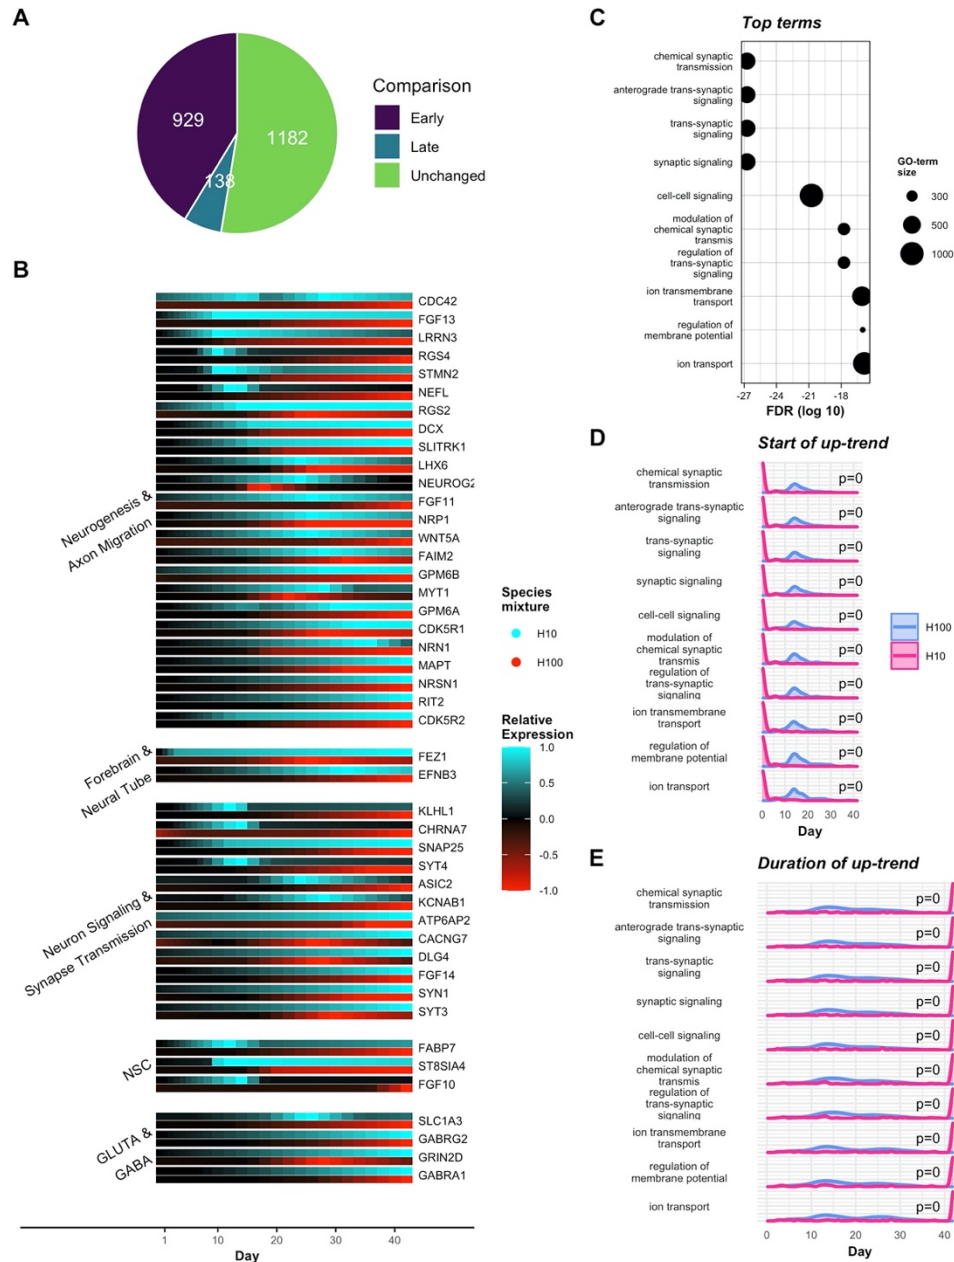

Figure 3: Earlier increases in gene expression in H10 show accelerated activity in signaling gene-sets. (A) All genes which trend up in both H10 and H100 are classified as either early, late, or unchanged in H10 relative to H100. These counts omit genes which start up-regulating between days 0 and 2 in either H10 or H100 as these genes could not be early/late regardless of induced change in expression. (B) Relative expression plots of a curated subset of early-up (EU) genes collected into functional/regional groups. H10 (blue) and H100 (red) time courses are scaled such that 0 expression shows black and maximum expression between H10 and H100 shows as 1/-1 (within gene). (C) Top 10 most significantly enriched GO terms show a strong acceleration in the activation of signaling pathways. Term enrichments are displayed in terms of log<sub>10</sub> adjusted p-values (FDR) and sized by the number of genes in the term, not all of which are necessarily classified as EU. (D) Densities of the time of start of the up-trend among (EU) genes in each of the selected GO terms. The distribution of H10 start times (magenta) are tested for significant shift to the left relative to H100 (blue) (KS test). EU genes are observed to typically start increasing from day 0 in the H10 sample. (E) Densities of the duration of the identified up-trend in genes for the same GO terms. Testing for a significant shift to the right in H10 relative to H100 shows the observed pattern to be significant, and EU genes in H10 can be seen to typically increase for the entire time course.

808

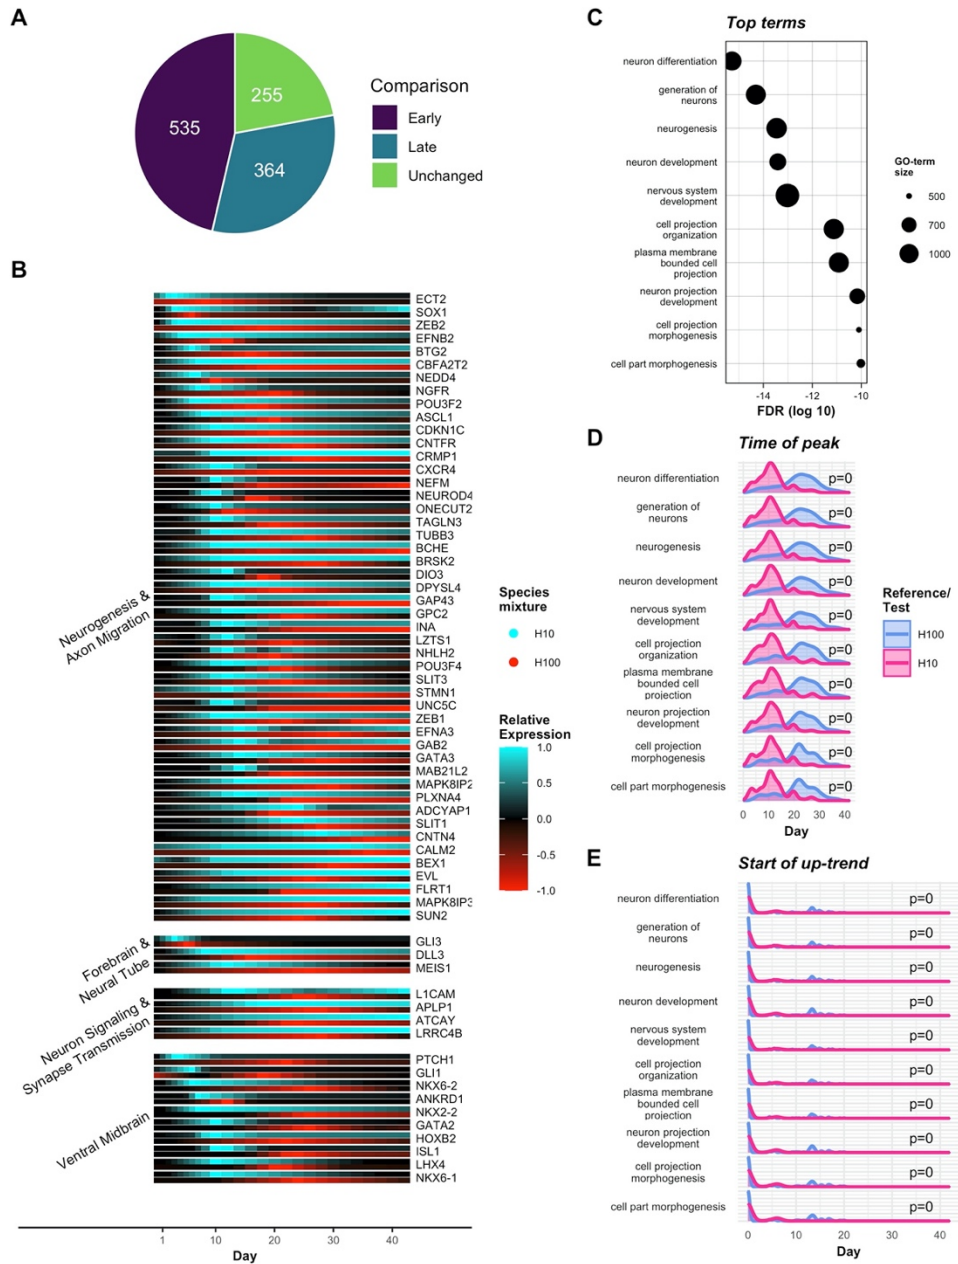

Figure 4: Earlier peaks in gene expression in H10 show accelerated activity in neuron development gene-sets. (A) All genes which peak in both H10 and H100 are classified as either early, late, or unchanged in H10 relative to H100. (B) Relative expression plots of a curated subset of early-peak (EP) genes collected into functional/regional groups. H10 (blue) and H100 (red) time courses are scaled such that 0 expression shows black and maximum expression between H10 and H100 shows as 1/-1 (within gene). (C) Top 10 most significantly enriched GO terms show a strong acceleration in the activation of neuron development pathways. Term enrichments are displayed in terms of log<sub>10</sub> adjusted p-values (FDR) and sized by the number of genes in the term, not all of which are necessarily classified as EP. (D) Densities of the time of peak among (EP) genes in each of the selected GO terms. The distribution of H10 start times (magenta) are tested for significant shift to the left relative to H100 (blue) (KS test). (E) Densities of the start of the up-trend leading to the peak in the identified EP genes for the same GO terms. Testing for a significant shift to the left in H10 relative to H100 shows the observed pattern to be significant.



809

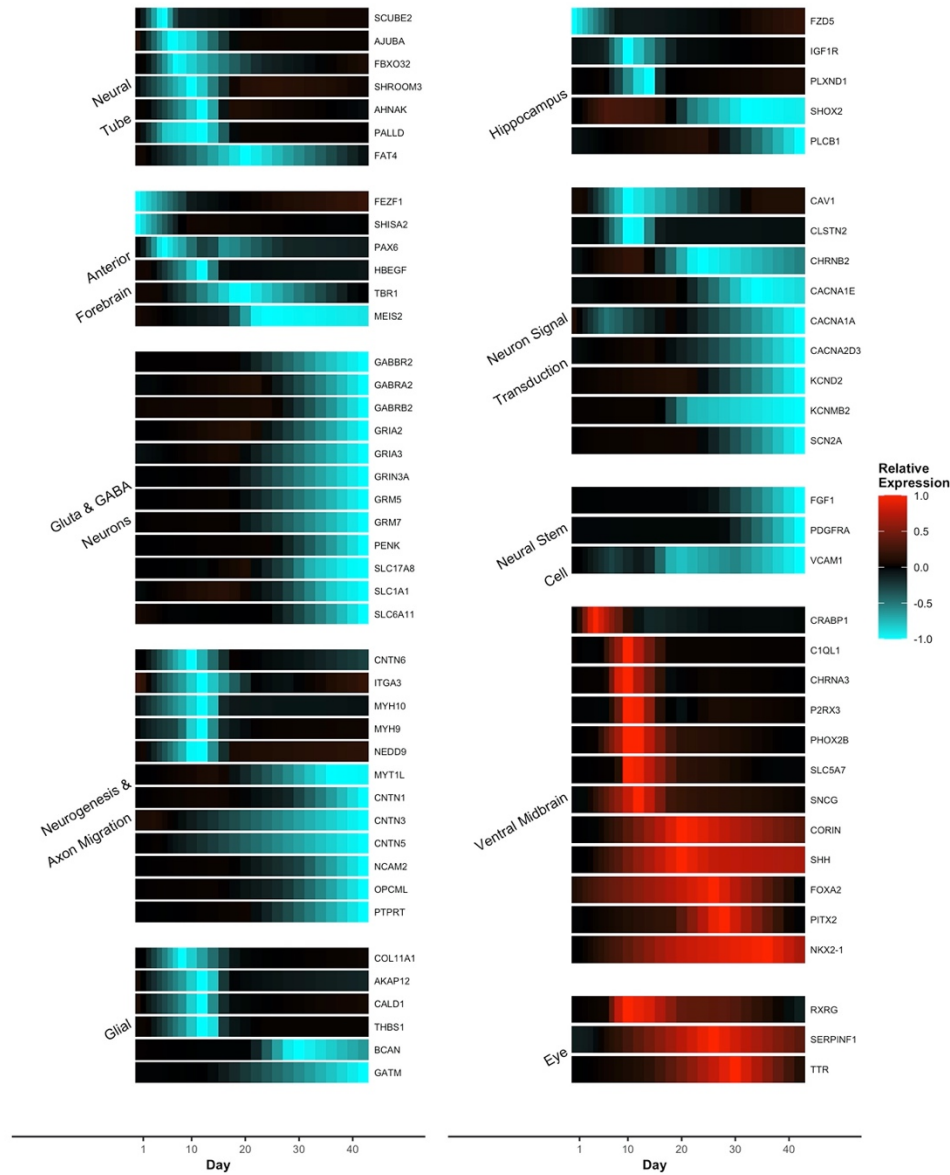

Figure 5: Up/down regulation of genes in H10 show region specific patterns. Relative expressions of curated genes in regional/functional groups are plotted on a normalized -1 to 1 scale. Gene expression (within gene) is normalized such that the maximum difference in fitted expression (in H100 or H10) equals 1. Relative expressions are then calculated as the difference between H10 and H100 where higher H10 values tend towards 1 (red), lower H10 values tend towards -1 (blue), and equivalent values tend towards 0 (black).

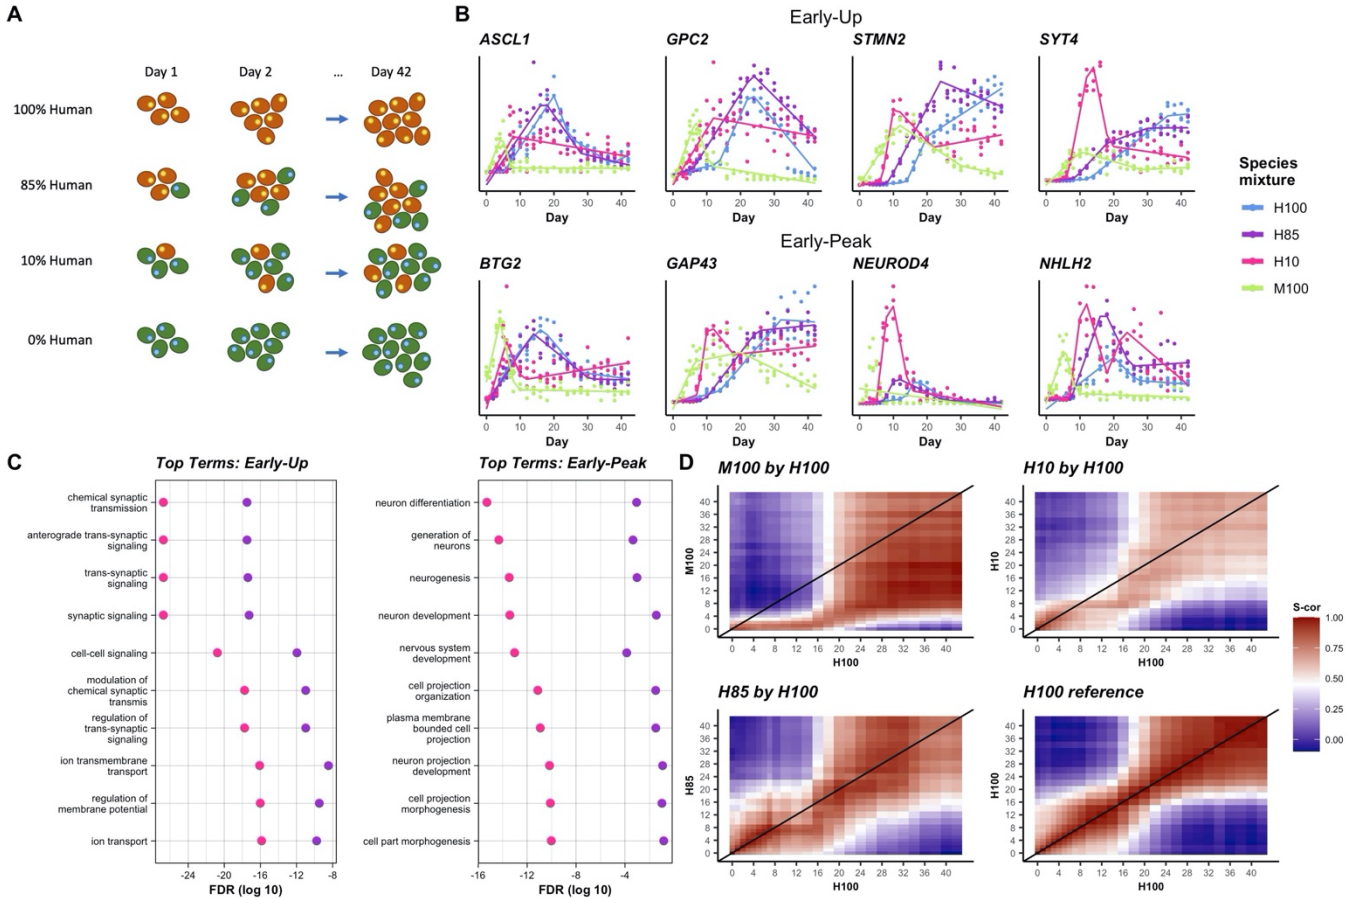

Figure 6: Variable mixing proportions show a dose response. (A) An additional, intermediate species mixing proportion is propagated and sequenced, denoted H85. (B) Expression plots of curated EU and EP genes with fitted trend lines (solid) for H100 (blue), H85 (purple), H10 (red), and M100 (green). Observed, normalized data are also plotted (dots). (C) Top 10 EU and EP GO terms from H10 showing relative significance of term enrichment for H10 and H85. (D) Correlation (Spearman) heat maps where regions of high correlation (red) below the diagonal indicate accelerated activity where later days in H100 are correlated with earlier days in the comparison mixture. Correlations are calculated on a subset of highly dynamic genes (see statistical methods).

810

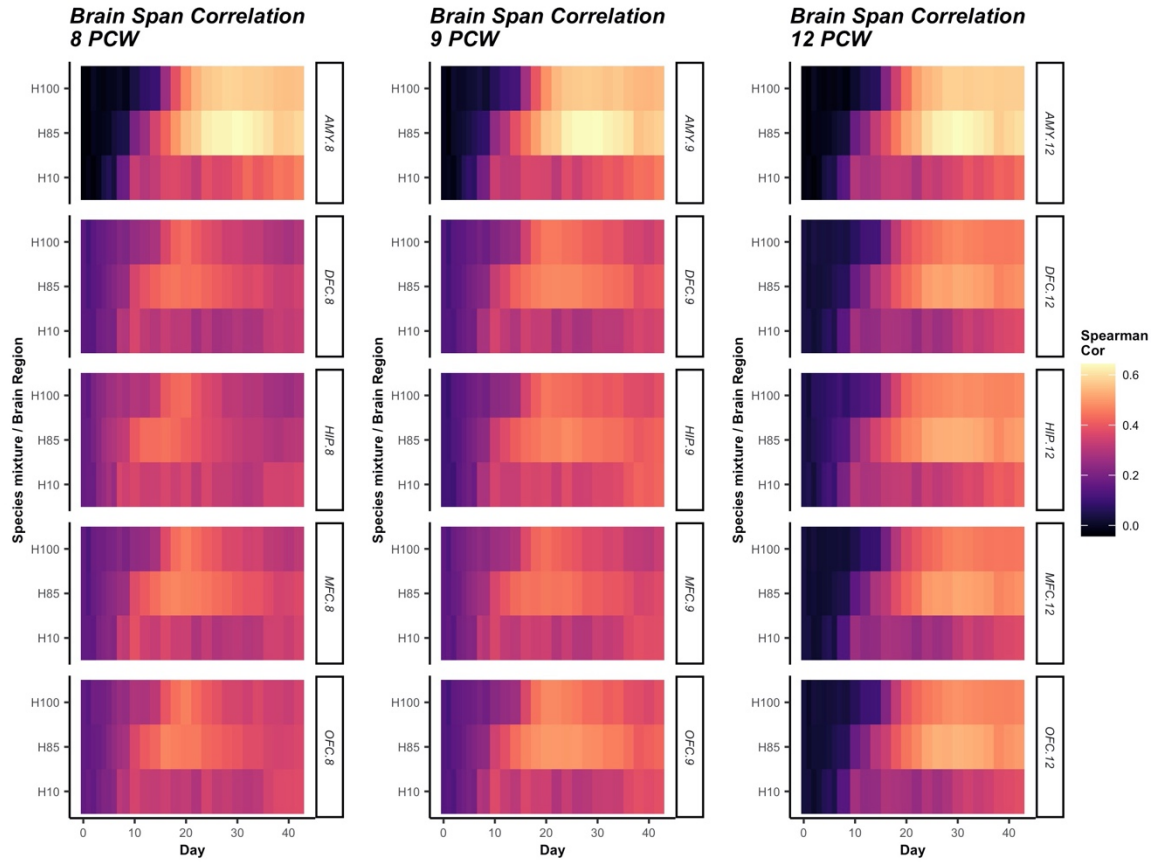

Figure 7: Correlation with Brain-Span regions further demonstrates dose response behaviors. Correlations (Spearman) between fitted trends and Brain-Span data are calculated at three Brain-Span time points and across the five brain regions represented at all time points. Calculations are performed on a subset of highly dynamic genes (see statistical methods).

811
